# Supplementary material for: Appraising the Effects of Metabolic Traits on the Risk of Glaucoma: A Mendelian Randomization Study
Source: MDPI journal article supplement (doi:10.3390/metabo13010109), 2023-01-09
Supplement: s1 [file s1]

**Table S1. Sensitivity analyses of genetically predicted risk factors with glaucoma in the meta-analysis of the UK Biobank and GERA studies.**

| Exposures | Used SNPs | Cochrane's Q | Weighted Median   |       | MR-Egger          |       |                                     | Maximum Likelihood |                      | MR-PRESSO |                   |       |                                      |
|-----------|-----------|--------------|-------------------|-------|-------------------|-------|-------------------------------------|--------------------|----------------------|-----------|-------------------|-------|--------------------------------------|
|           |           |              | OR (95% CI)       | P     | OR (95% CI)       | P     | P <sub>intercept</sub> <sup>a</sup> | OR (95% CI)        | P                    | Outliers  | OR (95% CI)       | P     | P <sub>distortion</sub> <sup>b</sup> |
| BMI       | 606       | 876          | 1.09 (0.95, 1.24) | 0.237 | 1.33 (1.04, 1.71) | 0.026 | 0.027                               | 1.02 (0.95, 1.10)  | 0.584                | 6         | 1.00 (0.92, 1.10) | 0.930 | 0.073                                |
| SBP       | 225       | 404          | 0.99 (0.87, 1.11) | 0.826 | 0.83 (0.64, 1.06) | 0.131 | 0.054                               | 1.04 (0.97, 1.11)  | 0.323                | 5         | 1.03 (0.95, 1.13) | 0.451 | 0.953                                |
| DBP       | 287       | 464          | 1.06 (0.89, 1.26) | 0.511 | 0.78 (0.57, 1.08) | 0.132 | 0.066                               | 1.03 (0.93, 1.14)  | 0.563                | 4         | 1.01 (0.89, 1.14) | 0.897 | 0.130                                |
| LDL-C     | 77        | 114          | 1.02 (0.92, 1.14) | 0.686 | 0.98 (0.87, 1.11) | 0.798 | 0.823                               | 0.99 (0.93, 1.06)  | 0.871                | 2         | 0.99 (0.93, 1.07) | 0.874 | 0.993                                |
| HDL-C     | 87        | 129          | 0.99 (0.87, 1.12) | 0.877 | 0.93 (0.79, 1.10) | 0.391 | 0.559                               | 0.97 (0.90, 1.04)  | 0.404                | 0         | NA                | NA    | NA                                   |
| TG        | 55        | 95           | 0.94 (0.83, 1.06) | 0.307 | 0.95 (0.80, 1.13) | 0.587 | 0.775                               | 0.93 (0.86, 1.01)  | 0.102                | 1         | 0.95 (0.87, 1.03) | 0.241 | 0.608                                |
| TC        | 83        | 130          | 0.99 (0.89, 1.10) | 0.804 | 0.95 (0.83, 1.08) | 0.410 | 0.288                               | 1.00 (0.94, 1.07)  | 0.960                | 2         | 1.01 (0.94, 1.09) | 0.778 | 0.878                                |
| FG        | 68        | 128          | 1.37 (1.05, 1.78) | 0.020 | 1.49 (0.99, 2.25) | 0.063 | 0.364                               | 1.27 (1.08, 1.50)  | 0.004                | 1         | 1.30 (1.04, 1.61) | 0.022 | 0.837                                |
| FI        | 34        | 67           | 0.86 (0.52, 1.40) | 0.536 | 0.82 (0.18, 3.74) | 0.798 | 0.769                               | 1.02 (0.73, 1.42)  | 0.912                | 2         | 1.00 (0.68, 1.48) | 0.998 | 0.004                                |
| HbA1c     | 72        | 108          | 1.50 (1.03, 2.20) | 0.036 | 1.22 (0.73, 2.05) | 0.446 | 0.770                               | 1.31 (1.04, 1.65)  | 0.021                | 2         | 1.30 (1.00, 1.68) | 0.051 | 0.976                                |
| T2D       | 134       | 433          | 1.06 (1.00, 1.13) | 0.061 | 1.07 (0.92, 1.25) | 0.399 | 0.933                               | 1.08 (1.04, 1.12)  | 1.1×10 <sup>-4</sup> | 6         | 1.05 (1.00, 1.09) | 0.050 | 0.150                                |

Note: BMI, body mass index; CI, confidence intervals; DBP, diastolic blood pressure; FG, fasting glucose; FI, fasting insulin; HbA1c, hemoglobin A1c; HDL-C, high-density lipoprotein cholesterol; LDL-C, low-density lipoprotein cholesterol; NA, not available; OR, odds ratio; SBP, systolic blood pressure; T2D, type 2 diabetes; TC, total cholesterol; TG, triglyceride.

<sup>a</sup>  $P < 0.05$  indicates a statistically significant pleiotropic effect MR-Egger intercept test.

<sup>b</sup>  $P < 0.05$  indicates a statistically significant difference between estimates before and after outlier removal in MR-PRESSO test.

**Table S2. Sensitivity analyses of genetically predicted risk factors with glaucoma in the FinnGen consortium.**

| Exposures | Used SNPs | Cochrane's Q | Weighted Median   |                       | MR-Egger          |          |                                            | Maximum Likelihood |                      | Outliers | MR-PRESSO         |                      |                                             |
|-----------|-----------|--------------|-------------------|-----------------------|-------------------|----------|--------------------------------------------|--------------------|----------------------|----------|-------------------|----------------------|---------------------------------------------|
|           |           |              | OR (95% CI)       | <i>P</i>              | OR (95% CI)       | <i>P</i> | <i>P</i> <sub>intercept</sub> <sup>a</sup> | OR (95% CI)        | <i>P</i>             |          | OR (95% CI)       | <i>P</i>             | <i>P</i> <sub>distortion</sub> <sup>b</sup> |
| BMI       | 600       | 688          | 1.01 (0.86, 1.19) | 0.892                 | 1.19 (0.90, 1.58) | 0.219    | 0.063                                      | 0.93 (0.84, 1.03)  | 0.149                | 4        | 0.93 (0.84, 1.02) | 0.134                | 0.924                                       |
| SBP       | 216       | 326          | 1.13 (0.97, 1.32) | 0.103                 | 1.02 (0.77, 1.37) | 0.869    | 0.436                                      | 1.14 (1.04, 1.25)  | 0.004                | 1        | 1.13 (1.02, 1.26) | 0.025                | 0.859                                       |
| DBP       | 273       | 387          | 0.99 (0.79, 1.23) | 0.913                 | 1.12 (0.78, 1.62) | 0.542    | 0.740                                      | 1.06 (0.93, 1.20)  | 0.370                | 1        | 1.07 (0.93, 1.25) | 0.345                | 0.888                                       |
| LDL-C     | 78        | 97           | 1.03 (0.91, 1.17) | 0.648                 | 1.10 (0.97, 1.23) | 0.131    | 0.132                                      | 1.03 (0.95, 1.10)  | 0.488                | 0        | NA                | NA                   | NA                                          |
| HDL-C     | 86        | 105          | 0.98 (0.84, 1.14) | 0.807                 | 1.06 (0.88, 1.27) | 0.535    | 0.089                                      | 0.93 (0.85, 1.01)  | 0.094                | 0        | NA                | NA                   | NA                                          |
| TG        | 53        | 70           | 0.93 (0.79, 1.08) | 0.335                 | 0.93 (0.77, 1.13) | 0.498    | 0.802                                      | 0.95 (0.86, 1.06)  | 0.366                | 1        | 0.97 (0.87, 1.07) | 0.539                | 0.501                                       |
| TC        | 82        | 88           | 1.03 (0.92, 1.16) | 0.598                 | 1.03 (0.90, 1.18) | 0.646    | 0.698                                      | 1.01 (0.93, 1.09)  | 0.792                | 0        | NA                | NA                   | NA                                          |
| FG        | 65        | 96           | 1.23 (0.90, 1.69) | 0.190                 | 1.12 (0.71, 1.75) | 0.637    | 0.656                                      | 1.22 (0.99, 1.50)  | 0.064                | 1        | 1.28 (1.02, 1.62) | 0.041                | 0.675                                       |
| FI        | 35        | 90           | 0.81 (0.43, 1.50) | 0.494                 | 0.90 (0.10, 7.96) | 0.928    | 0.818                                      | 1.16 (0.77, 1.76)  | 0.475                | 3        | 0.82 (0.48, 1.39) | 0.465                | 0.249                                       |
| HbA1c     | 72        | 132          | 1.31 (0.81, 2.11) | 0.276                 | 1.50 (0.69, 3.28) | 0.313    | 0.542                                      | 1.22 (0.90, 1.65)  | 0.192                | 3        | 1.27 (0.89, 1.80) | 0.198                | 0.849                                       |
| T2D       | 133       | 213          | 1.19 (1.09, 1.29) | 5.6×10 <sup>-05</sup> | 1.15 (1.00, 1.33) | 0.058    | 0.869                                      | 1.14 (1.09, 1.20)  | 5.0×10 <sup>-8</sup> | 3        | 1.13 (1.07, 1.19) | 1.1×10 <sup>-5</sup> | 0.678                                       |

Note: BMI, body mass index; CI, confidence intervals; DBP, diastolic blood pressure; FG, fasting glucose; FI, fasting insulin; HbA1c, hemoglobin A1c; HDL-C, high-density lipoprotein cholesterol; LDL-C, low-density lipoprotein cholesterol; NA, not available; OR, odds ratio; SBP, systolic blood pressure; T2D, type 2 diabetes; TC, total cholesterol; TG, triglyceride.

<sup>a</sup> *P* < 0.05 indicates a statistically significant pleiotropic effect MR-Egger intercept test.

<sup>b</sup> *P* < 0.05 indicates a statistically significant difference between estimates before and after outlier removal in MR- PRESSO test.

**Table S3. Multivariable Mendelian randomization associations of genetically predicted type 2 diabetes with glaucoma adjusted for confounding traits.**

| Model                | UK Biobank + GERA |          | FinnGen consortium |                      | Combined          |                      |
|----------------------|-------------------|----------|--------------------|----------------------|-------------------|----------------------|
|                      | OR (95% CI)       | <i>P</i> | OR (95% CI)        | <i>P</i>             | OR (95% CI)       | <i>P</i>             |
| Unadjusted model     | 1.08 (1.01, 1.15) | 0.033    | 1.14 (1.07, 1.21)  | $2.0 \times 10^{-5}$ | 1.11 (1.06, 1.16) | $4.4 \times 10^{-6}$ |
| Adjusted for BMI     | 1.07 (1.00, 1.15) | 0.040    | 1.14 (1.07, 1.21)  | $2.9 \times 10^{-5}$ | 1.11 (1.06, 1.16) | $7.9 \times 10^{-6}$ |
| Adjusted for SBP     | 1.09 (1.01, 1.17) | 0.030    | 1.12 (1.05, 1.20)  | $1.0 \times 10^{-3}$ | 1.11 (1.05, 1.16) | $8.9 \times 10^{-5}$ |
| Adjusted for DBP     | 1.08 (1.01, 1.16) | 0.022    | 1.14 (1.07, 1.22)  | $2.8 \times 10^{-5}$ | 1.12 (1.07, 1.17) | $3.0 \times 10^{-6}$ |
| Adjusted for LDL-C   | 1.07 (1.00, 1.15) | 0.049    | 1.14 (1.07, 1.22)  | $4.6 \times 10^{-5}$ | 1.11 (1.06, 1.16) | $1.5 \times 10^{-5}$ |
| Adjusted for HDL-C   | 1.09 (1.01, 1.17) | 0.024    | 1.15 (1.07, 1.23)  | $5.8 \times 10^{-5}$ | 1.12 (1.07, 1.18) | $6.7 \times 10^{-6}$ |
| Adjusted for TG      | 1.08 (1.01, 1.16) | 0.031    | 1.14 (1.07, 1.22)  | $7.2 \times 10^{-5}$ | 1.11 (1.06, 1.17) | $1.2 \times 10^{-5}$ |
| Adjusted for TC      | 1.07 (1.00, 1.15) | 0.049    | 1.14 (1.07, 1.22)  | $4.0 \times 10^{-5}$ | 1.11 (1.06, 1.16) | $1.6 \times 10^{-5}$ |
| Adjusted for FG      | 1.06 (0.98, 1.16) | 0.159    | 1.15 (1.06, 1.24)  | $5.9 \times 10^{-4}$ | 1.11 (1.05, 1.17) | $4.6 \times 10^{-4}$ |
| Adjusted for FI      | 1.08 (1.01, 1.15) | 0.028    | 1.14 (1.07, 1.21)  | $3.2 \times 10^{-5}$ | 1.11 (1.06, 1.16) | $5.6 \times 10^{-6}$ |
| Adjusted for HbA1c   | 1.06 (0.99, 1.13) | 0.127    | 1.12 (1.06, 1.20)  | $2.5 \times 10^{-4}$ | 1.09 (1.04, 1.14) | $2.0 \times 10^{-4}$ |
| Adjusted for smoking | 1.07 (1.00, 1.15) | 0.039    | 1.14 (1.07, 1.21)  | $2.9 \times 10^{-5}$ | 1.11 (1.06, 1.16) | $7.7 \times 10^{-6}$ |
| Adjusted for alcohol | 1.07 (1.00, 1.15) | 0.039    | 1.13 (1.06, 1.20)  | $1.2 \times 10^{-4}$ | 1.10 (1.06, 1.16) | $2.2 \times 10^{-5}$ |

Note: BMI, body mass index; CI, confidence intervals; DBP, diastolic blood pressure; FG, fasting glucose; FI, fasting insulin; HbA1c, hemoglobin A1c; HDL-C, high-density lipoprotein cholesterol; LDL-C, low-density lipoprotein cholesterol; OR, odds ratio; SBP, systolic blood pressure; TC, total cholesterol; TG, triglyceride.
